# Supplementary material
Source: PubMed Central journal article supplement (PMC4325764)
Supplement: AAC.04623-14_zac003153779so1.pdf [file AAC.04623-14_zac003153779so1.pdf]

1 Supplemental Material

2

3 Figure S1

4

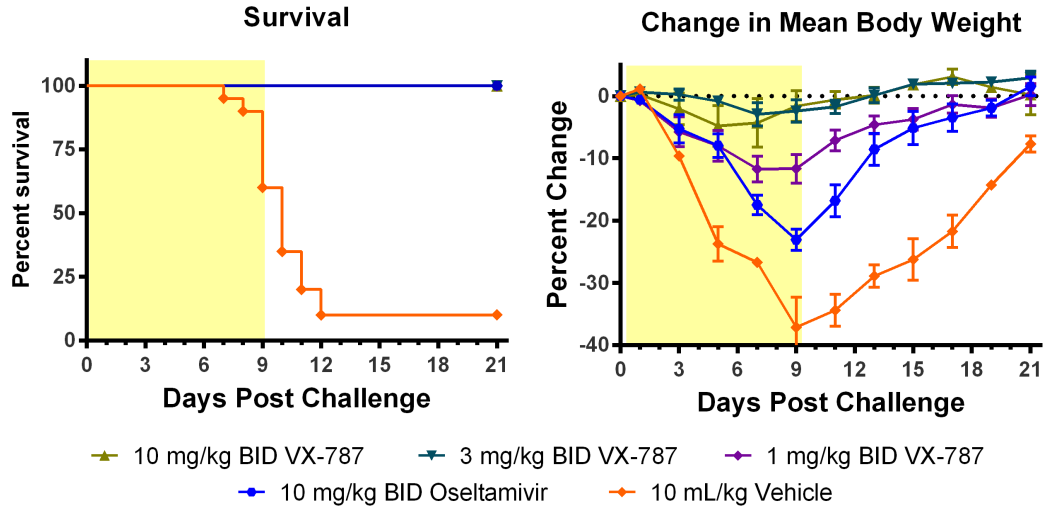

5

6

7 Figure S1. VX-787 demonstrates superior efficacy against 2009 pandemic influenza  
8 (H1N1pdm09) when compared to oseltamivir. The time course of morbidity/mortality,  
9 and bodyweight loss for BALB/c mice (10-20/group) challenged with  
10 A/California/04/2009 (H1N1pdm09) and treated with VX-787 or oseltamivir. Treatment  
11 with VX-787, oseltamivir or vehicle was initiated 2 h prior to infection, and continued  
12 BID for 10 days as denoted by the yellow boxes. Mice were monitored every day for  
13 morbidity/mortality and every other day for bodyweight loss (mean  $\pm$  SEM) and plotted  
14 as Survival (Left panel) or percent bodyweight change (Right panel) for 21 days.

15

16

17 **Supplemental Tables**  
 18

Table S1. Isothermal titration calorimetry and surface plasmon resonance results for VX-787, and m<sup>7</sup>GTP binding to PB2

|                          | ITC           |                    |              |              |                | SPR Kinetics       |                                                      |                                       | SPR Steady State   |
|--------------------------|---------------|--------------------|--------------|--------------|----------------|--------------------|------------------------------------------------------|---------------------------------------|--------------------|
|                          | Stoichiometry | K <sub>D</sub> (M) | ΔH (cal/mol) | ΔG (cal/mol) | -TΔS (cal/mol) | K <sub>D</sub> (M) | k <sub>on</sub> (M <sup>-1</sup> sec <sup>-1</sup> ) | k <sub>off</sub> (sec <sup>-1</sup> ) | K <sub>D</sub> (M) |
| VRT-0761704 <sup>a</sup> | 0.93          | 4.02 E-07          | -8145        | -8731        | -585           | -                  | -                                                    | -                                     | 3.3-3.5E-07        |
| SD <sup>b</sup>          | 0.08          | 6.30 E-08          | 532          | 97           | 590            | -                  | -                                                    | -                                     | -                  |
| VX-787                   | 0.84          | 2.38E-08           | -8151        | -10419       | -2268          | 8.28E-09           | 2.61E+06                                             | 0.021                                 | 1.3-1.5E-08        |
| SD                       | 0.07          | 7.45E-09           | 289          | 192          | 481            | 2.80E-10           | 1.20E+06                                             | 0.009                                 | -                  |
| m <sup>7</sup> GTP       | 1.24          | 1.53E-06           | -6247        | -7914        | -1667          | -                  | -                                                    | -                                     | -                  |
| SD                       | 0.04          | 3.44E-07           | 353          | 192          | 479            | -                  | -                                                    | -                                     | -                  |

<sup>a</sup>Mean of 3 or more determinations  
<sup>b</sup>Standard Deviation

19  
 20

Table S2. Summary of VX-787 and Oseltamivir prophylaxis and start to treatment efficacy experiments in a murine pulmonary influenza A model (A/Puerto Rico/8/34)

| Treatment Start Time Relative to Infection (h) | VX-787 Dose (mg/kg; BID) | Oseltamivir Dose (mg/kg; BID) | Survival (Percent) | Bodyweight Loss on Study Day 9 (Percent±SEM) |
|------------------------------------------------|--------------------------|-------------------------------|--------------------|----------------------------------------------|
| -2                                             | 10                       |                               | 100                | -2.8±1.9                                     |
|                                                | 3                        |                               | 100                | -8.7±1.1                                     |
|                                                | 1                        |                               | 100                | -16.8±1.1                                    |
|                                                | 0.3                      |                               | 25                 | -30.4±1.8                                    |
|                                                | 0.1                      |                               | 0                  | -31.9±2.0                                    |
|                                                |                          |                               | 10                 | 100                                          |
| +24                                            | 0                        |                               | 0                  | -32.2±0.9                                    |
|                                                | 10                       |                               | 100                | -6.2±1.4                                     |
|                                                | 3                        |                               | 100                | -14.2±1.5                                    |
|                                                | 1                        |                               | 100                | -23.4±1.5                                    |
|                                                |                          |                               | 10                 | 100                                          |
| +48                                            | 0                        |                               | 0                  | -33.8±0.9                                    |
|                                                | 10                       |                               | 100                | -7.1±1.2                                     |
|                                                | 3                        |                               | 100                | -10.9±1.6                                    |
|                                                | 1                        |                               | 100                | -22.5±1.5                                    |
|                                                |                          |                               | 10                 | 12.5                                         |
| +72                                            | 0                        |                               | 0                  | -34.4±0.8                                    |
|                                                | 10                       |                               | 100                | -17.4±1.3                                    |
|                                                | 3                        |                               | 100                | -23.2±1.4                                    |
|                                                | 1                        |                               | 100                | -29.4±1.5                                    |
|                                                |                          |                               | 10                 | N.D.                                         |
| +96                                            | 0                        |                               | 0                  | -36.1±1.0                                    |
|                                                | 10                       |                               | 100                | -25.5±1.2                                    |
|                                                | 3                        |                               | 100                | -27.3±1.8                                    |
|                                                |                          |                               | 10                 | N.D.                                         |
| +120                                           | 0                        |                               | 0                  | -34.6±1.1                                    |
|                                                | 10                       |                               | 30                 | -34.4±1.6                                    |
|                                                | 3                        |                               | 10                 | -32.6±1.5                                    |
|                                                |                          |                               | 10                 | N.D.                                         |
|                                                |                          | 0                             | 0                  | -34.6±1.0                                    |

N.D., not determined due to health  
N=8 mice/group

21  
22

Table S3. Summary of VX-787 efficacy against pandemic influenza in a murine pulmonary influenza A prophylaxis model (A/California/04/2009)

| Strain                          | Treatment Start Time Relative to Infection (h) | VX-787 Dose (mg/kg; BID) | Osetamivir Dose (mg/kg; BID) | Survival (Percent) | Bodyweight Loss on Study Day 9 (Percent) | Lung Viral Titers Day 6 (Log Titer/ Lungs $\pm$ SD) | Log <sub>10</sub> Reduction vs. Vehicle |
|---------------------------------|------------------------------------------------|--------------------------|------------------------------|--------------------|------------------------------------------|-----------------------------------------------------|-----------------------------------------|
| A/California/04/2009(H1N1pdm09) | -2h                                            | 10                       |                              | 100                | 1.3                                      | <sup>a</sup> <2.6***                                | >5.3                                    |
|                                 |                                                | 3                        |                              | 100                | 2.4                                      | 3.1 $\pm$ 0.9***                                    | 4.8                                     |
|                                 |                                                | 1                        |                              | 100                | 11.5                                     | 5.5 $\pm$ 1.2***                                    | 2.4                                     |
|                                 |                                                |                          | 10                           | 100                | 22.8                                     | 7.9 $\pm$ 0.2                                       | 0                                       |
|                                 |                                                | 0                        |                              | 0                  | 32.6                                     | 7.9 $\pm$ 0.4                                       | N/A                                     |

Two-way ANOVA with Bonferroni Post Test, \*P<0.05, \*\*P<0.01, \*\*\*P<0.001

N=5 Mice/group

<sup>a</sup>Level of detection

Table S4. Summary of VX-787 efficacy against avian influenza A/Viet Nam/1203/2004 (H5N1) in a murine pulmonary influenza A model

| Treatment Start Time Relative to Infection (h) | VX-787 Dose (mg/kg; BID) | Oseltamivir Dose (mg/kg; BID) | Survival (Percent) | Bodyweight Loss on Study Day 7 (Percent $\pm$ SEM) |
|------------------------------------------------|--------------------------|-------------------------------|--------------------|----------------------------------------------------|
| -2h                                            | 10                       |                               | 100                | 0.5 $\pm$ 0.1                                      |
|                                                | 3                        |                               | 100                | 1.3 $\pm$ 1.0                                      |
|                                                | 1                        |                               | 100                | 1.6 $\pm$ 1.1                                      |
|                                                |                          | 10                            | 100                | 1.2 $\pm$ 0.9                                      |
|                                                | 0                        |                               | 0                  | 15.6 $\pm$ 1.4                                     |
| +24                                            | 10                       |                               | 100                | 2.9 $\pm$ 2.7                                      |
|                                                | 3                        |                               | 100                | 6.5 $\pm$ 3.4                                      |
|                                                |                          | 10                            | 0                  | 13.2 $\pm$ 1.6                                     |
|                                                | 0                        |                               | 0                  | 16.0 $\pm$ 1.8                                     |
| +48                                            | 10                       |                               | 100                | 2.1 $\pm$ 0.9                                      |
|                                                | 3                        |                               | 100                | 4.9 $\pm$ 0.8                                      |
|                                                |                          | 10                            | 0                  | 19.8 $\pm$ 1.8                                     |
|                                                | 0                        |                               | 0                  | 16.0 $\pm$ 1.8                                     |
| +72                                            | 10                       |                               | 100                | 2.3 $\pm$ 2.1                                      |
|                                                | 3                        |                               | 70                 | 3.3 $\pm$ 1.1                                      |
|                                                |                          | 10                            | N.D.               | N.D.                                               |
|                                                | 0                        |                               | 0                  | 16.0 $\pm$ 1.8                                     |
| +96                                            | 10                       |                               | 100                | 1.4 $\pm$ 2.0                                      |
|                                                | 3                        |                               | 30                 | 16.6 $\pm$ 7.2                                     |
|                                                |                          | 10                            | N.D.               | N.D.                                               |
|                                                | 0                        |                               | 0                  | 16.0 $\pm$ 1.8                                     |
| +120                                           | 10                       |                               | 70                 | 12.7 $\pm$ 2.0                                     |
|                                                | 3                        |                               | 0                  | 18.4 $\pm$ 3.7                                     |
|                                                |                          | 10                            | N.D.               | N.D.                                               |
|                                                | 0                        |                               | 0                  | 16.0 $\pm$ 1.8                                     |

N.D. Not determined

N=10 mice/group for treated and 20 mice/group for controls

27  
28  
29  
30  
31

Table S5. *In vitro* activity of VX-787, Oseltamivir carboxylate and Zanamivir against representative influenza type B strains

| <b>Virus</b>    | <b>Mean EC<sub>50</sub> (μM)</b> |                                |                  |
|-----------------|----------------------------------|--------------------------------|------------------|
|                 | <b>VX-787</b>                    | <b>Oseltamivir carboxylate</b> | <b>Zanamivir</b> |
| B/Lee/40        | > 10 ± ND, n=2                   | > 10 ± ND, n=4                 | > 10 ± ND, n=2   |
| B/Maryland/1/59 | > 10 ± ND, n=1                   | 1.7 ± 0.42, n=2                | 7.5 ± ND, n=3    |
| B/Taiwan/2/62   | > 10 ± ND, n=1                   | 0.40 ± 0.29, n=2               | 0.21 ± 0.16, n=2 |

Data shown represent mean ± standard deviation of “n” independent experiments.

EC<sub>50</sub>: effective concentration at which ATP is half the maximum in the CPE-based assay.
